## Title Page

### Scoping into Non Iron Deficiency Anemia: Reflection from the Rural India

Somen Saha<sup>1,2</sup>, Tapasvi Puwar<sup>1</sup>, Deepak Saxena<sup>1,2</sup>, Komal Shah<sup>1</sup>, Apurva kumar Pandya<sup>1</sup>,  
Nikita Vadsariya<sup>1</sup>, Bharat Desai<sup>1</sup>, Raj Suthariya<sup>3</sup>

<sup>1</sup> Indian Institute of Public Health, Gandhinagar, Gujarat

<sup>2</sup> Datta Meghe Institute of Medical Sciences, Wardha, Maharashtra

<sup>3</sup> Zilla Panchayat, Devbhumi Dwarka, Gujarat

## Abstract

**Introduction:** Anaemia is one of the leading public health problems. India accounts for the highest prevalence of anaemia in the world. Anaemia programs in India focus on screening and management of anaemia based on haemoglobin estimation, treatment is being given irrespective of status of iron as well as other micronutrient storage. The present study assesses the prevalence of anaemia and iron deficiency (ID) based on low serum ferritin status among antenatal and postnatal women in Devbhoomi Dwarka District of Gujarat.

**Methods:** A total of 258 pregnant (AN) and postnatal (PN) women drawn from 27 primary health centres were studied. Anaemia was evaluated based on haemoglobin concentration obtained from venous whole blood, using auto-analyser. Serum ferritin was used to evaluate iron status in the study. Serum ferritin was assessed using the direct chemiluminescence method using MINI VIDAS which is a compact automated immunoassay system based on the Enzyme Linked Fluorescent Assay (ELFA) principles.

**Results:** Overall, Anaemia (low Hb) and ID (low s. ferritin) was observed in 65.9% and 27.1% respectively. Out of anaemic participants, about 38.2% reported ID while the remaining 61.8% had normal s. ferritin (i.e. non-iron deficient anaemia). Anaemia was reported 69.1% in AN women and 57.1% in PN women. The ID was reported higher (30.9%) in AN woman than PN women (17.1%). However, the prevalence of anaemia, as well as IDA decreased from the first to the third trimester.

**Conclusion:** Two out of every three women were anaemic; one out of four were anaemic with depleted iron storage. Importantly, two out of five women had anaemia but iron storage was sufficient. Strategy to prevent and correct anaemia must include screening for iron and

non-iron deficiency anaemia and follow appropriate treatment protocol for both types of anaemia.

## Introduction

Anaemia is one of the common public health problems in India. According to The National Family Health Survey (2016) <sup>[1]</sup>, 58.6% of children, 53.2% of non-pregnant women and 50.4% of pregnant women were anaemic.

Iron deficiencies are the most common cause of anaemia in the world. <sup>[2]</sup> Other micronutrients such as folate, B12 and vitamin A and infections such malaria, TB, worm infestation, haemorrhoids and other inherited diseases of haemoglobin synthesis are also causes of Anaemia, which may complicate the ante and post-natal period. <sup>[3]</sup>

Presently in India, under the Intensive National Iron Plus Initiative (INIP), <sup>[4]</sup> oral and parenteral iron preparation, folate and albendazole are emphasized for prevention and treatment of maternal anaemia. Also, food fortification and food diversity are promoted as a strategy to prevent nutritional anaemia. Despite these efforts, anaemia is still a problem of public health.

Although Iron Deficiency (ID) is the reason for anaemia in 50% women worldwide but among half of the anaemic condition is other than ID. <sup>[2]</sup> However, as per current protocol, screening and management of maternal anaemia is planned by Haemoglobin (Hb) estimation<sup>[4]</sup> only, and treatment is being given irrespective of the status of iron as well as other micronutrient storage. Existing literature on IDA and Non-Iron Deficiency Anaemia (NIDA) are in the global context; however, studies on this topic is limited in Indian context. The present study assesses the prevalence of anaemia and iron deficiency (ID) based on low serum ferritin status among antenatal and postnatal women in Devbhoomi Dwarka District of Gujarat.

## Methods

A total of 258 pregnant (AN) and postnatal (PN) women drawn from 27 primary health centres were studied. Anaemia was assessed based on haemoglobin concentration obtained from venous whole blood, using auto-analyser. Serum ferritin was used to assess iron status in the study. Serum ferritin was assessed using the direct chemiluminescence method using MINI VIDAS which is a compact automated immunoassay system based on the Enzyme Linked Fluorescent Assay (ELFA) principles.

The pregnant women of any trimester (Antenatal – AN Women) and postnatal women (PN Women) within 90 days of pregnancy were included in the present study. After taking informed consent, basic details of participants such as name, age, gender, residence and obstetric history were gathered through pre-tested semi-structured questionnaires. From every participant 4 ml venous blood samples were taken as per the standard procedure through phlebotomist, lab technicians, at the respective PHC. The specimens were transported to the laboratory within one hour of collection and were stored at -20°C until the time of analysis.

Anaemia was defined as hemoglobin <11% in AN women and <12% in PN women.<sup>[5]</sup> IDA is defined as a combination of anemia and ID while NIDA is defined as the presence of anemia without ID. Low serum ferritin with normal C-reactive protein level was considered as a biomarker for iron deficiency. S. ferritin as a more sensitive and specific marker for ID estimation and for planning management of maternal anemia.<sup>[6,7]</sup> Similar marker was used by Comprehensive National Nutritional Survey-2018-19<sup>[8]</sup>, India. Following the WHO guidelines, ID based on s. ferritin level was defined as <12 ng/ml in AN women and <15ng/dl in PN Women<sup>[9,10]</sup> S. ferritin levels increase in phase of acute inflammation.<sup>[3]</sup> Hence, any women with signs or symptoms of acute inflammation in the last 7 days were excluded from the study.

Data were analysed using SPSS version 22. Chi-square was used to know the relation between variables. Formal approval was obtained from the District Authority and Ethical clearance was sought from the Institutional Ethics Committee at Indian Institute of Public Health Gandhinagar.

## Results

A total of 258 women were enrolled from the PHC. The overall mean age of the study participants was 25.3 years which was almost similar in the group of AN and PN women (25.7 and 25.1 years respectively). (Table 1)

**Table 1. Age distribution of the in Antenatal (AN) and Postnatal (PN) women**

|                 | AN women (N=188)     | PN women (N=70)      | Overall (N=258)      |
|-----------------|----------------------|----------------------|----------------------|
| <b>Mean Age</b> | 25.7 $\pm$ 3.7 years | 25.1 $\pm$ 3.9 years | 25.3 $\pm$ 3.8 years |

Overall, Anaemia (low Hb) and ID (low s. ferritin) was observed in 65.9% and 27.1% respectively. Out of anaemic participants, about 38.2% reported ID while 61.8% had normal s. ferritin (i.e. NIDA). The difference in s. ferritin and Hb concentration among anemic and non-anaemic was statistically significant ( $\chi^2=31.08$ , df=1,  $P<0.0001$ ) (Table 2).

**Table 2. Relation between Iron deficiency and Anemia in all patients (N=258)**

| <b>Hb gm% status</b>              | <b>S. ferritin status</b> |                       | <b>Total</b>        |
|-----------------------------------|---------------------------|-----------------------|---------------------|
|                                   | <b>Deficient S. Iron</b>  | <b>Normal S. Iron</b> |                     |
| Anemia                            | 65 (38.2%)                | 105 (61.8%)           | 170 (100.0%)        |
| Normal Hb                         | 5 (5.7%)                  | 83 (94.3%)            | 88 (100.0%)         |
| <b>Total</b>                      | <b>70 (27.1%)</b>         | <b>188 (72.9%)</b>    | <b>258 (100.0%)</b> |
| $\chi^2=31.08$ , df=1, $P<0.0001$ |                           |                       |                     |

Among all study participants, IDA was observed in 25% while 41% had NIDA. The proportion of IDA was higher in AN woman (28%) than PN women (17%) while the proportion of NIDA was almost similar among AN and PN women (41% and 40% respectively). Overall, only 2% of them were at risk of developing anaemia as they have iron deficiency but no anaemia (Figure 1).

Out of total participants, 73.2% were AN women and 26.8% were PN women. Anaemia was reported 69.1% in AN women and 57.1% in PN women. The ID was reported higher (30.9%) in AN women than PN women (17.1%). Amongst all anaemic participants, IDA was 40.8% in AN women and 30% in PN women whereas NIDA was observed to be 59.2% and 70%

among AN and PN women respectively. (Table 3) The comparative profile of s. ferritin and Hb concentration among AN and PN women are presented in the Table 3. The difference in s. ferritin and Hb concentration among anaemic and non-anaemic group of AN women were found statistically significant ( $\chi^2=19.4$ , df=1,  $P<0.0001$ ).

**Table 3. Relation between Iron deficiency and Anemia in AN (N=188) and PN women (N=70)**

| Hb gm% status in AN women        | S. ferritin status |                    | Total               |
|----------------------------------|--------------------|--------------------|---------------------|
|                                  | Deficient S. Iron  | Normal S. Iron     |                     |
| Anemia                           | 53 (40.8%)         | 77 (59.2%)         | 170 (100.0%)        |
| Normal Hb                        | 5 (8.6%)           | 53 (91.4%)         | 88 (100.0%)         |
| <b>Total</b>                     | <b>58 (30.9%)</b>  | <b>130 (69.1%)</b> | <b>188 (100.0%)</b> |
| $\chi^2=19.4$ , df=1, $P<0.0001$ |                    |                    |                     |
| Hb gm% status in PN women        | S. ferritin status |                    | Total               |
|                                  | Deficient S. Iron  | Normal S. Iron     |                     |
| Anemia                           | 12 (30.0%)         | 28 (70.0%)         | 40 (100.0%)         |
| Normal Hb                        | 0 (0.0%)           | 30 (100.0%)        | 30 (100.0%)         |
| <b>Total</b>                     | <b>12 (17.1%)</b>  | <b>58 (82.9%)</b>  | <b>70 (100.0%)</b>  |
| $\chi^2=NA$                      |                    |                    |                     |

The prevalence of anaemia, as well as IDA decreased from the first to the third trimester; 50%, 40.7% and 39.7% in first, second and third trimester respectively. The difference between these two parameters in second trimester found statistically significant ( $\chi^2=17.2$ , df=1,  $P<0.0001$ ) while it was not significant in first trimester ( $\chi^2=2.17$ , df=1,  $P=0.14$ ). (Table 4).

**Table 4. Trimester wise distribution of Iron deficiency and Anemia status in AN woman (N=187)**

| Hb gm% status in | S. ferritin status |  |
|------------------|--------------------|--|
|------------------|--------------------|--|

| <b>1<sup>st</sup>-trimester women</b> | <b>Deficient S. Iron</b>  | <b>Normal S. Iron</b> | <b>Total</b>       |
|---------------------------------------|---------------------------|-----------------------|--------------------|
| Anemia                                | 4 (50.0%)                 | 4 (50.0%)             | 8 (100.0%)         |
| Normal Hb                             | 2 (18.2%)                 | 9 (81.8%)             | 11 (100.0%)        |
| <b>Total</b>                          | <b>6 (31.6%)</b>          | <b>13 (68.4%)</b>     | <b>19 (100.0%)</b> |
| □ 2=2.17, df=1, P=0.14                |                           |                       |                    |
| <b>Hb gm% status in</b>               | <b>S. ferritin status</b> |                       | <b>Total</b>       |
| <b>2<sup>nd</sup>-trimester women</b> | <b>Deficient S. Iron</b>  | <b>Normal S. Iron</b> |                    |
| Anaemia                               | 24 (40.7%)                | 35 (59.3%)            | 59 (100.0%)        |
| Normal Hb                             | 3 (21.4%)                 | 11 (78.6%)            | 14 (100.0%)        |
| <b>Total</b>                          | <b>27 (37.0%)</b>         | <b>46 (63.0%)</b>     | <b>73 (100.0%)</b> |
| □ 2=17.2, df=1, P<0.0001              |                           |                       |                    |
| <b>Hb gm% status in</b>               | <b>S. ferritin status</b> |                       | <b>Total</b>       |
| <b>3<sup>rd</sup>-trimester women</b> | <b>Deficient S. Iron</b>  | <b>Normal S. Iron</b> |                    |
| Anaemia                               | 25 (39.7%)                | 38 (60.3%)            | 63 (100.0%)        |
| Normal Hb                             | 0 (0.0%)                  | 32 (100.0%)           | 32 (100.0%)        |
| <b>Total</b>                          | <b>25 (26.3%)</b>         | <b>70 (73.7%)</b>     | <b>95 (100.0%)</b> |
| □ 2 -- NA                             |                           |                       |                    |

## Discussion

The present study was conducted to know the relation between haemoglobin and s. ferritin in pregnant and lactating women.

About 27.1% of the study participant had ID (low s. ferritin) while 38.2% of them were screened as anemia (low Hb) in the present study which is within the range of 19% to 61% reported in various studies conducted in low and middle income countries.<sup>[11]</sup>

The prevalence of NIDA was significantly higher than IDA in all participants as well as in AN and PN women group. In a review of European iron-status studies in women,<sup>[12]</sup> ID was reported in 25–77% of pregnant women, and IDA was reported in 6–30% of pregnant women. A study conducted among AN woman in tertiary care center of India reported 34% IDA and 14% NIDA.<sup>[13]</sup> Muthukumaran et al<sup>[14]</sup> reported IDA proportion higher (60%) than the present study (40%) in the third trimester AN woman. The proportion of IDA was lower than NIDA in second trimester among anemic women. Prophylactic oral iron consumption during the second and third trimester might be the reason behind this variation.

As per National guidelines, the screening of anemia is being carried out among AN and PN women by haemoglobin estimation while no screening is being carried out for iron deficiency in India. Comprehensive National Nutrition survey 2016-18 (CNNS 2016-18), had reported higher prevalence of the NIDA (16.9%) than IDA (12%) among adolescent (age 10 – 19 years) by using s. ferritin as a screening tool and also stated ID as the strongest predictor of Anemia among adolescent.<sup>[15]</sup> Similar to that large scale survey of AN, as well as PN women by s. ferritin can be useful to know the burden of the IDA as well as NIDA and focus can be prioritize for anemia control.

Various preventive measures are being carried out to address nutritional anemia includes food fortification and food diversity but for the treatment of anemia especially moderate to severe, oral and parenteral iron along with folate are indicated in second and third trimester irrespective of iron status of the body.<sup>[4]</sup> Due to physiological depletion in iron storage, iron supplements are mandatory in the pregnancy period.<sup>[16]</sup> As observed in the present study, a large number of AN mothers (59.2%) were anemic might be due to causes other than the ID.<sup>[17]</sup> Even globally it was evidenced that reason behind half of the anemic patients was other than ID.<sup>[2]</sup> Thus, in context to nutritional anemia, other micronutrient deficiencies needed to be assessed and addressed for tackling maternal anemia effectively.

## Conclusion

Iron Deficiency Anemia is still a public health problem. However, the proportion of Non-Iron Deficiency Anemia observed in the present study is alarming that ought to be addressed. Two out of every three women are anaemic; one out of four were anaemic with depleted iron storage. Importantly, two out of five women had anaemia but iron storage was sufficient. To achieve the ambitious National nutrition target 2025 – 50% reduction of anaemia in women of reproductive age, strategy to prevent and correct anaemia must include screening for iron and non-iron deficiency anaemia and follow appropriate treatment protocol for both types of anaemia.

**Acknowledgements:** The exercise is part of a comprehensive baseline assessment under Project Tushti, a three-year initiative (2019 – 2022) supported through Nayara Energy. The project aims to address malnutrition in Devbhumi Dwarka in collaboration with the Department of Women and Child Development through ICDS program and the Health and Family Welfare Department, Gujarat

**Funding statement:** The authors declare that this study received funding from Nayara Energy. The funder had no role in study design, data collection and analysis, decision to publish, or preparation of the manuscript.

**Conflict of interest:** All authors declare no conflict of interest.

## References



1. IIPS. National Family Health Survey (NFHS 4), 2015-16: India, Pretest Report. International Institute for Population Sciences. 2014.
2. Stevens GA, Finucane MM, De-Regil LM, Paciorek CJ, Flaxman SR, Branca F, et al. Global, regional, and national trends in haemoglobin concentration and prevalence of total and severe anaemia in children and pregnant and non-pregnant women for 1995-2011: a systematic analysis of population-representative data. *Lancet Glob Heal* 2013;1(1):e16-25.
3. World Health Organization, Centers for Disease Control and Prevention. Report of a Joint World Health Organization/Centers for Disease Control and Prevention Technical Consultation on the Assessment of Iron Status at the Population Level [Internet]. World Health Organization, Dept. of Nutrition for Health and Development; Centers for Disease Control and Prevention, Division of Nutrition and Physical Activity, International Micronutrient Malnutrition Prevention and Control Program: 2005. Available from: <https://stacks.cdc.gov/view/cdc/6681>
4. Ministry of Health and Family Welfare G of I. Anemia Mukh Bharat. Intensified National Iron Plus Initiative (I-NIPI): Operational Guidelines for Programme Managers. 2018;
5. MoHFW. Government of India. Guidelines for control of iron deficiency anemia - 2013. Available at <https://www.nhm.gov.in/images/pdf/programmes/child-health/guidelines/Control-of-Iron-Deficiency-Anaemia.pdf> (Accessed on 18 October 2020).
6. Romslo I, Haram K, Sagen N, Augensen K. Iron requirement in normal pregnancy as assessed by serum ferritin, serum transferrin saturation and erythrocyte protoporphyrin determinations. *Br J Obstet Gynaecol* 1983;90(2):101-7.
7. Tandon R, Jain A, Malhotra P. Management of Iron Deficiency Anemia in Pregnancy in India. *Indian J Hematol blood Transfus an Off J Indian Soc Hematol Blood Transfus* 2018;34(2):204-15.
8. Ministry of Health and Family Welfare (MoHFW), Government of India, UNICEF and Population Council. 2019. Comprehensive National Nutrition Survey (CNNS) National Report. New Delhi.

9. Daru J, Allotey J, Peña-Rosas JP, Khan KS. Serum ferritin thresholds for the diagnosis of iron deficiency in pregnancy: a systematic review. *Transfus. Med.* 2017;27(3):167–74.
10. Organization WH. Serum ferritin concentrations for the assessment of iron status and iron deficiency in populations. World Health Organization; 2011.
11. Harika R, Faber M, Samuel F, Kimiywe J, Mulugeta A, Eilander A. Micronutrient Status and Dietary Intake of Iron, Vitamin A, Iodine, Folate and Zinc in Women of Reproductive Age and Pregnant Women in Ethiopia, Kenya, Nigeria and South Africa: A Systematic Review of Data from 2005 to 2015. *Nutrients* 2017;9(10).
12. Hercberg S, Preziosi P, Galan P. Iron deficiency in Europe. *Public Health Nutr* 2001;4(2B):537–45.
13. Tiwari M, Kotwal J, Kotwal A, Mishra P, Dutta V, Chopra S. Correlation of haemoglobin and red cell indices with serum ferritin in Indian women in second and third trimester of pregnancy. *Med journal, Armed Forces India* 2013;69(1):31–6.
14. Muthukumaran NS, Thangappah RBP, Azad A, Sravaniy K. Evaluating iron deficiency anaemia in the third trimester of pregnancy with haematological parameters and serum ferritin concentration. *Int J Reprod Contraception, Obstet Gynecol Vol 8, No 9 Sept 2019* DOI - 1018203/2320-1770.ijrcog20193809 2019;
15. Lahiri A, Singh KD, Ramaswamy G, Yadav K, Sethi V, Scott S, et al. Iron Deficiency Is the Strongest Predictor of Anemia in Indian Adolescents Aged 10–19 years: Evidence from the Comprehensive National Nutrition Survey. *Curr Dev Nutr* 2020;4(Supplement\_2):1819.
16. Fisher AL, Nemeth E. Iron homeostasis during pregnancy. *Am J Clin Nutr* 2017;106(Suppl 6):1567S-1574S.
17. Wieringa FT, Dahl M, Chamnan C, Poirot E, Kuong K, Sophonneary P, et al. The High Prevalence of Anemia in Cambodian Children and Women Cannot Be Satisfactorily Explained by Nutritional Deficiencies or Hemoglobin Disorders. *Nutrients* 2016;8(6).



Figure 1: Anemia Vs Iron deficiency in participants

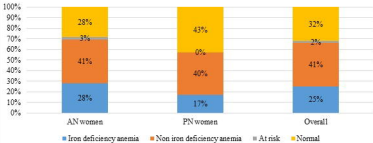

Source: http://medrxiv.stage.highwire.org/content/10.1101/2021.02.10.21251472v1.full.pdf
